# Supplementary material for: Piper aduncum Essential Oil Rich in Dillapiole: Development of Hydrogel-Thickened Nanoemulsion and Nanostructured Lipid Carrier Intended for Skin Delivery
Source: MDPI journal article supplement (doi:10.3390/pharmaceutics14112525), 2022-11-19
Supplement: s1 [file s1]

## SUPPLEMENTARY MATERIAL

### ***Piper aduncum* essential oil rich in dillapiole: development of hydrogel-thickened nanoemulsion and nanostructured lipid carrier intended for skin delivery**

Simone Braga Carneiro<sup>1†</sup>, Tainá Kreutz<sup>2†</sup>, Renata Pereira Limberger<sup>2</sup>, Helder Ferreira Teixeira<sup>2</sup>, Valdir Florêncio da Veiga Júnior<sup>3</sup>, Letícia Scherer Koester<sup>2\*</sup>

#### **Affiliation**

1 Programa de Pós-Graduação em Inovação Farmacêutica, Faculdade de Ciências Farmacêuticas, Universidade Federal do Amazonas, Av. Gal. Rodrigo Octávio, Coroado I, 1200, Zip code 69067-005, Manaus, Amazonas, Brazil

2 Programa de Pós-Graduação em Ciências Farmacêuticas, Faculdade de Farmácia, Universidade Federal do Rio Grande do Sul, Av. Ipiranga, Santana, 2752, Zip code 90610-000, Porto Alegre, Rio Grande do Sul, Brazil

3 Programa de Pós-Graduação em Química, Instituto Militar de Engenharia, Praça General Tibúrcio, Urca, 80, Zip code 22290-270, Rio de Janeiro, Rio de Janeiro, Brazil

\* Correspondence: leticia.koester@ufrgs.br.

† Both authors contributed equally to this manuscript.

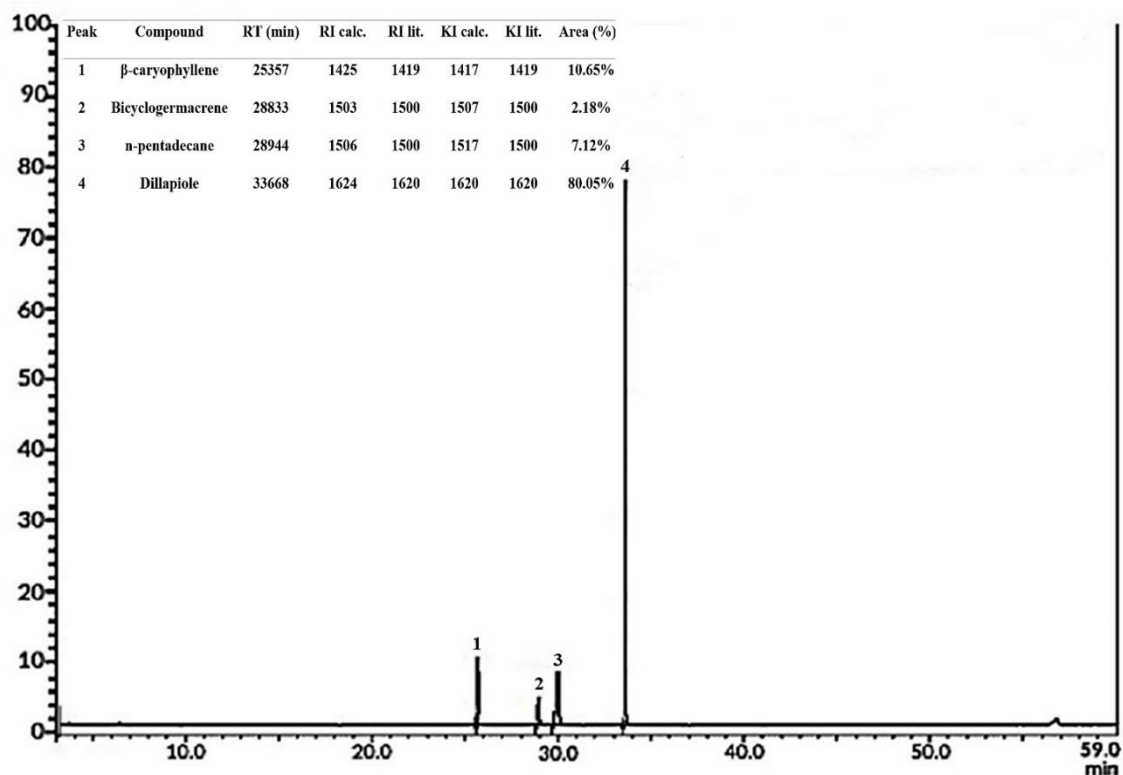

**Figure S1.** *P. aduncum* essential oil chromatogram performed by gas chromatography coupled to mass spectrometry. The compounds are (1)  $\beta$ -caryophyllene 10.65%, (2) bicyclogermacrene 2.18%, (3) n-pentadecane 7.12% and (4) dillapiole 80.05%. RT: Retention Time; RI calc.: Retention Index calculated; RI lit.: Retention Index from literature [36]; KI calc.: Kovats Index calculated; KI lit.: Kovats Index from literature [36].
